# Supplementary material for: Inhibition of human thrombin by the constituents of licorice: inhibition kinetics and mechanistic insights through in vitro and in silico studies
Source: Royal Society of Chemistry journal article supplement (doi:10.1039/c9ra09203j), 2020-01-01
Supplement: c9ra09203j1.pdf [file c9ra09203j1.pdf]

## Supplementary Information

*for*

### **Inhibition of human thrombin by the constituents of licorice: inhibition kinetics and mechanistic insights through *in vitro* and *in silico* studies**

Cheng-Cheng Shi, ‡<sup>ab</sup> Tian-Ran Chen, ‡<sup>bcd</sup> Qi-Hua Zhang,<sup>e</sup> Ling-Hua Wei,<sup>f</sup> Chao Huang,<sup>b</sup> Ya-Di Zhu,<sup>b</sup> Hai-Bin Liu<sup>c</sup>,

Ya-Kun Bai,<sup>f</sup> Fang-Jun Wang,<sup>g</sup> Wen-Zhi Guo,<sup>\*f</sup> Li-Rong Zhang<sup>\*a</sup> and Guang-Bo Ge<sup>\*bg</sup>

<sup>a</sup> Department of Pharmacology, School of Basic Medical Sciences, Zhengzhou University, Zhengzhou, Henan, China.

<sup>b</sup> Institute of Interdisciplinary Integrative Medicine Research, Shanghai University of Traditional Chinese Medicine, Shanghai, China.

<sup>c</sup> National Engineering Research Center for Gelatin-based Traditional Chinese Medicine, Dong-E-E-Jiao Co. Ltd., Dong-E, Shandong, China.

<sup>d</sup> Department of Gastrointestinal Surgery, The Fifth Affiliated Hospital of Zhengzhou University, Zhengzhou, China.

<sup>e</sup> CAS Key Laboratory of Receptor Research, Drug Discovery and Design Center, Shanghai Institute of Materia Medica, Chinese Academy of Sciences, Shanghai, China.

<sup>f</sup> Department of Hepatobiliary and Pancreatic Surgery, The First Affiliated Hospital of Zhengzhou University; Henan Key Laboratory of Digestive Organ Transplantation, Zhengzhou, China.

<sup>g</sup> CAS Key Laboratory of Separation Sciences for Analytical Chemistry, Dalian Institute of Chemical Physics, Chinese Academy of Sciences, Dalian, 116023, China.

\*Corresponding authors:

E-mail addresses: zhanglirongzzu@126.com (L.-R. Zhang); & geguangbo@dicp.ac.cn (G.-B. Ge); & guowz66@163.com (W.-Z. Guo)

‡ These authors contributed equally to this work.

This file contains four supplementary figures and one table.

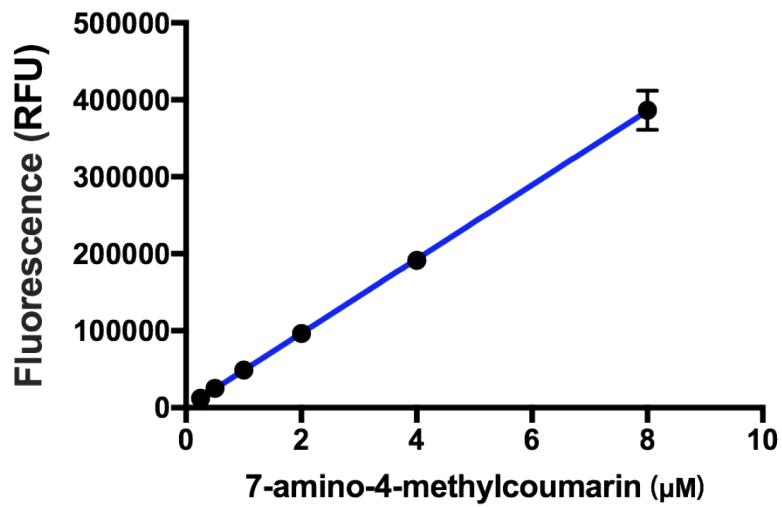

**Figure S1.** The standard curve of the fluorescent product (7-amino-4-methylcoumarin) after reaction of thrombin with the substrate (Z-Gly-Gly-Arg-AMC acetate), the equation was  $Y = 48114 \cdot X + 570.3$ ; X means concentrations of 7-amino-4-methylcoumarin; Y means fluorescence.

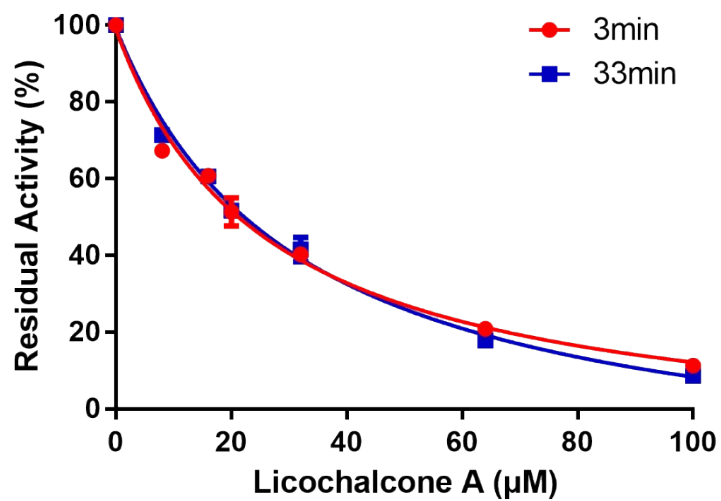

**Figure S2.** The time-dependent inhibition curves of licochalcone A against thrombin (3 min and 33 min). All inhibition experiments were performed in triplicate (n=3) and the values are expressed as mean  $\pm$  SD.

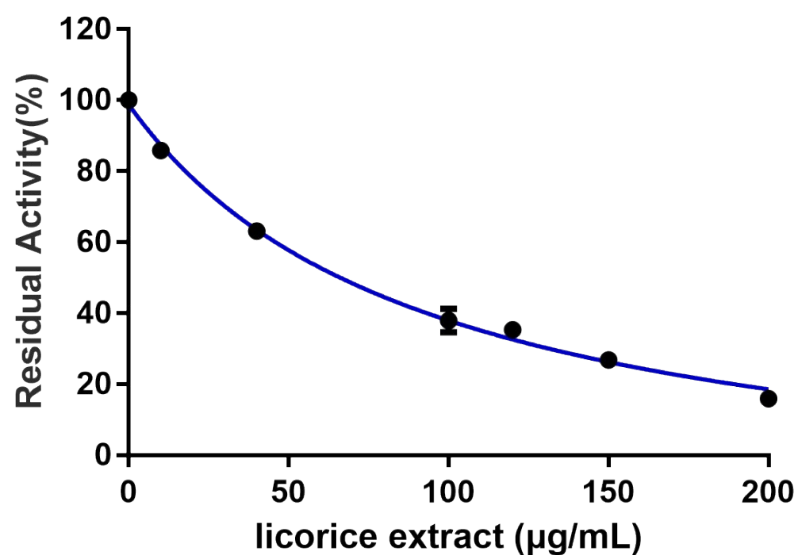

**Figure S3.** The dose-response curves of licorice extract on human thrombin. All inhibition experiments were performed in triplicate (n=3) and the values are expressed as mean  $\pm$  SD.

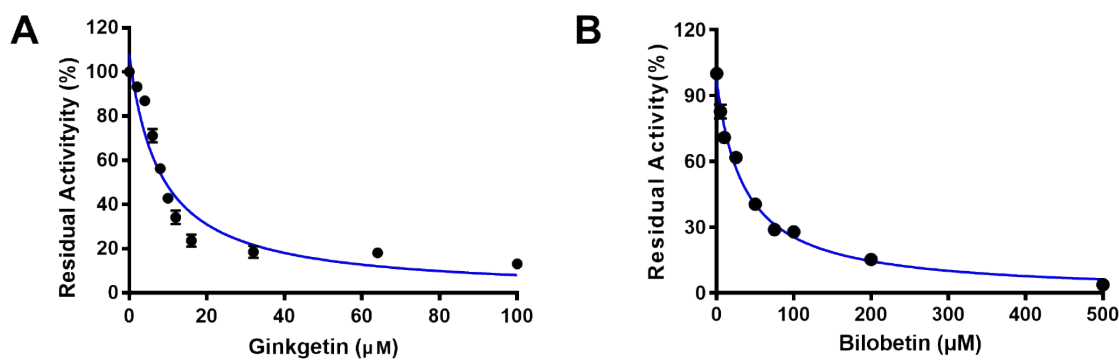

**Figure S4.** The dose-response curves of ginkgetin and baicalein on human thrombin. All inhibition experiments were performed in triplicate (n=3) and the values are expressed as mean  $\pm$  SD.

**Table S1. The labeling ratios of different lysine residues in human thrombin** (The amino acid numbers indicate human thrombin numbering).

| Sequences | Residues | Labeling ratios                    |                                 |
|-----------|----------|------------------------------------|---------------------------------|
|           |          | Thrombin without<br>licochalcone A | Thrombin with<br>licochalcone A |
| RKSPQELL  | Lys-36   | 93%                                | 100%                            |

|                           |                           |             |             |
|---------------------------|---------------------------|-------------|-------------|
| PPWDKNFTENDLL             | Lys-60F                   | Not labeled | Not labeled |
| ERNIEKISML                | Lys-81                    | 98%         | 100%        |
| MKLKKPVAFSDY              | Lys-107, Lys-109, Lys-110 | 80%         | 0%          |
| KGRVTGW                   | Lys-135                   | 100%        | 100%        |
| GNLKETW                   | Lys-145                   | 100%        | 33%         |
| TANVGKGQPSVL              | Lys-149E                  | 93%         | 50%         |
| QVVNLPIVERPVCKDSTRIRITDNM | Lys-169                   | Not labeled | Not labeled |
| KPDEGKRGDACEGDSGGPF       | Lys-185, Lys-186D         | 100%        | 96%         |
| GEGCDRDGKYGF              | Lys-224                   | 38%         | 0%          |
| IQKVIDQFGE                | Lys-240                   | 95%         | 70%         |
